## An association between autosomal-dominant polycystic kidney disease and the risk of acute myocardial infarction in Asian population — results of a nationwide study

Pei-Hsun Sung<sup>1</sup>, Hsin-Ju Chiang<sup>2</sup>, Yao-Hsu Yang<sup>3,4,5</sup>, Chi-Jen Chen<sup>5</sup>, John Y. Chiang<sup>6,7</sup>, Hon-Kan Yip<sup>1,8,9,10</sup>

<sup>1</sup>Division of Cardiology, Department of Internal Medicine, Kaohsiung Chang Gung Memorial Hospital and Chang Gung University College of Medicine, Kaohsiung, Taiwan

<sup>2</sup>Department of Obstetrics and Gynecology, Kaohsiung Chang Gung Memorial Hospital and Chang Gung University College of Medicine, Kaohsiung, Taiwan

<sup>3</sup>Department for Traditional Chinese Medicine, Chang Gung Memorial Hospital, Chiayi, Taiwan

<sup>4</sup>Institute of Occupational Medicine and Industrial Hygiene, National Taiwan University College of Public Health, Taipei, Taiwan

<sup>5</sup>Center of Excellence for Chang Gung Research Datalink, Chang Gung Memorial Hospital, Chiayi, Taiwan

<sup>6</sup>Department of Computer Science and Engineering, National Sun Yat-Sen University, Kaohsiung, Taiwan

<sup>7</sup>Department of Healthcare Administration and Medical Informatics, Kaohsiung Medical University, Kaohsiung, Taiwan

<sup>8</sup>Institute for Translational Research in Biomedicine, Center for Shockwave Medicine and Tissue Engineering, Kaohsiung Chang Gung Memorial Hospital and Chang Gung University College of Medicine, Kaohsiung, Taiwan

<sup>9</sup>Department of Medical Research, China Medical University Hospital, China Medical University, Taichung, Taiwan

<sup>10</sup>Department of Nursing, Asia University, Taichung, Taiwan

**Correspondence to:** Hon-Kan Yip, **email:** han.gung@msa.hinet.net

**Keywords:** autosomal-dominant polycystic kidney disease, acute myocardial infarction, Asian, Taiwanese, population-based cohort study

**Received:** August 24, 2016

**Accepted:** December 01, 2016

**Published:** December 27, 2016

### ABSTRACT

Cardiovascular complications are the leading causes of death in patients with autosomal-dominant polycystic kidney disease (ADPKD) in the Western countries. However, the prevalence and risk of acute myocardial infarction (AMI) in patients with ADPKD remain unknown, especially in Asian population. We utilized the data from Taiwan National Health Insurance Research Database (NHIRD) to perform a population-based cohort study (1997-2008). A total of 2062 patients with ADPKD were selected from one million of general population after excluding those patients with age less than 18 years old, receiving renal replacement therapy, and concomitant diagnoses of AMI. Additionally, we set up those patients without ADPKD as comparison group by matching study cohort with age, gender, income and urbanization with 1:10 ratio (n=20620). The results showed that although the prevalence of AMI in ADPKD patients in Taiwan was lower than those in the United States (2.91% v.s. 6%,  $p=0.0567$ ), the Taiwanese ADPKD group had significantly higher prevalence of AMI as compared with the non-ADPKD group (2.91% v.s. 0.97%,  $p<0.0001$ ). In addition, Kaplan-Meier analysis demonstrated that cumulative incidence of AMI was significantly higher in ADPKD than in the non-ADPKD group (all  $p<0.001$ ). After adjusting for age, gender and comorbidities by multivariate and sensitivity analysis, ADPKD patients had 2.43-fold greater risk for developing AMI as compared with non-ADPKD patients (95% CI 1.8 to 3.29,  $p<0.0001$ ). In conclusion, Taiwanese patients with ADPKD have lower prevalence of AMI as compared to Americans, whereas ADPKD *per se* remains independently predictive of AMI in Asian population.

## INTRODUCTION

Autosomal-dominant polycystic kidney disease (ADPKD) is the most common hereditary kidney disease [1]. The heterogeneous mutation of PKD 1 and PKD2 genes contributes to the development of ADPKD [2]. Prevalence of ADPKD in the United States has been reported to be around 1/1000 to 1/400 [3]. Even though the appropriate treatment was applied, end-stage of renal disease (ESRD) has been revealed to be eventually developed in 8%-10% of patients with ADPKD in the United States and Europe [4]. Additionally, as compared with the general population, patients with ADPKD have 1.6 to 3.2-folds of relative mortality rate [5].

Because of higher frequency of early-onset hypertension, left ventricular hypertrophy and valvular abnormalities, cardiovascular (CV) complications are the most common cause of death in the ADPKD population [6–8]. In fact, 81% of ADPKD patients have been reported to have coronary artery disease [8]. Furthermore, recent registered data has demonstrated that the prevalence rate of acute myocardial infarction (AMI) in American ADPKD patients was up to 6% [9]. Therefore, it deserved to be further understood how to prevent, diagnose and treat such a medical urgency in the ADPKD population.

Intriguingly, while an association between ADPKD and CV diseases including AMI had been well recognized in Western countries [6–9], there was no data to address the incidence and risk of AMI in ADPKD in Asia. Additionally, little is known whether prevalence of AMI in Asian ADPKD patients is actually as high as that in the Western population. This is mainly due to lack of long-term follow-up and surveillance of the CV complications in patients with ADPKD.

By using a 12-year Taiwan National Health Insurance Research Database (NHIRD) [10, 11], we intended to study the real-world prevalence, incidence and associated risk of AMI in Asian ADPKD patients.

## RESULTS

### Demographic characteristics, comorbidities, and prevalence of AMI in Taiwanese patients with and without ADPKD (Table 1)

Table 1 shows comparison of baseline characteristics and comorbidities between study and comparison cohorts. A total of 2,062 patients with ADPKD and 20,620 matched patients without ADPKD were eligible during 12-year dataset period. In both groups of ADPKD and non-ADPKD, 51.5% patients were female and median age was 47 years old (interquartile range 38-56). Majority of the patients were middle-aged (40-65 years old, 61.2%) and had urbanization level 1-2 (80.21%). Additionally, most of their economic status was relatively poor (i.e., monthly insurance taxable income  $\leq$ 25,000 New Taiwan dollars)

(72.54%). However, the frequency of comorbidities was significantly higher in the ADPKD group than that in the non-ADPKD group (all  $p$ -values  $<0.002$ ), except for diabetes mellitus (14.99% v.s. 15.15%,  $p=0.8467$ ).

At the end of follow-up period, a total of 60 and 201 cases of AMI developed in 2,062 ADPKD and 20,620 non-ADPKD patients, respectively. Accordingly, the ADPKD group had significantly higher prevalence rate of AMI as compared with the non-ADPKD group in Taiwan (2.91% v.s. 0.97%,  $p<0.0001$ ).

### Ethnic difference of prevalence of AMI and relevant cardiovascular comorbidities between American and Taiwanese patients with ADPKD (Table 2)

Data from Taiwan NHIRD reported the prevalence of AMI in ADPKD was 2.9%. On the other hand, the American registered data from Helal et al.[9] revealed that the prevalence of AMI in American ADPKD population was 6%, suggesting that the prevalence of AMI in ADPKD was relatively lower in Asian than in Western population ( $p=0.056$ ). Additionally, the prevalence of hypertension, dyslipidemia, arrhythmia, valvular heart disease and peripheral vascular disease in ADPKD was significantly lower in Taiwanese than in American population (all  $p$ -value  $<0.002$ ). Contrast to these parameters, the prevalence of heart failure in ADPKD was similar between these two different ethnical populations (i.e., around 10% in both,  $p=0.5527$ ). It was noteworthy that Taiwanese ADPKD population had much higher prevalence of diabetes mellitus than American ADPKD population (15% v.s. 8.7%,  $p=0.0008$ ).

### Comparison of incidence and associated risk of AMI between Taiwanese patients with ADPKD and without ADPKD (Table 3)

The incidence rate of AMI in patients with and without ADPKD was 459.5 and 145.1 per 100,000, respectively. Therefore, incidence rate ratio (IRR) of AMI in ADPKD to non-ADPKD was 3.17 (95% CI 2.37 to 4.22,  $p<0.0001$ ). After adjusting for age, gender and comorbidities with multivariate Cox regression analysis, patients with ADPKD had 2.43-fold risk for new occurrence of AMI as compared with those without ADPKD (95% CI 1.8 to 3.29,  $p<0.0001$ ). Besides, stratified analysis which was utilized to clarify the impact of each comorbidity on AMI showed that adjusted hazard ratio of AMI in ADPKD to non-ADPKD group was significantly higher in the subgroups of both gender, age older than or equal to 40 years old, and those with traditional atherosclerotic risk factors, i.e., hypertension, diabetes and dyslipidemia (all  $p$ -values  $<0.03$ ). These findings suggested the risk of AMI in ADPKD was actually greater than in non-ADPKD, especially in those

**Table 1: Demographic characteristics, comorbidities, and prevalence of AMI in Taiwanese patients with ADPKD and without ADPKD**

|                                 | ADPKD<br>(N = 2062) |       | Non-ADPKD*<br>(N = 20620) |       | P-value <sup>a</sup> |
|---------------------------------|---------------------|-------|---------------------------|-------|----------------------|
|                                 | No.                 | %     | No.                       | %     |                      |
| Gender                          |                     |       |                           |       | 1.00                 |
| Female                          | 1062                | 51.5  | 10620                     | 51.5  |                      |
| Male                            | 1000                | 48.5  | 10000                     | 48.5  |                      |
| Age                             |                     |       |                           |       | 1.00                 |
| 18-39                           | 574                 | 27.84 | 5740                      | 27.84 |                      |
| 40-65                           | 1262                | 61.2  | 12620                     | 61.2  |                      |
| >65                             | 226                 | 10.96 | 2260                      | 10.96 |                      |
| Median age (IQR)                | 47 (38-56)          |       | 47 (38-56)                |       |                      |
| Urbanization                    |                     |       |                           |       | 1.00                 |
| 1 (highest)                     | 742                 | 35.98 | 7420                      | 35.98 |                      |
| 2                               | 912                 | 44.23 | 9120                      | 44.23 |                      |
| 3                               | 291                 | 14.11 | 2910                      | 14.11 |                      |
| 4 (lowest)                      | 117                 | 5.67  | 1170                      | 5.67  |                      |
| Monthly income (NTD)            |                     |       |                           |       | 1.00                 |
| 0                               | 343                 | 16.63 | 3430                      | 16.63 |                      |
| 1-15,840                        | 296                 | 14.35 | 2960                      | 14.35 |                      |
| 15,841-25,000                   | 857                 | 41.56 | 8570                      | 41.56 |                      |
| >25,000                         | 566                 | 27.45 | 5660                      | 27.45 |                      |
| Comorbidities                   |                     |       |                           |       |                      |
| Hypertension                    | 1672                | 81.09 | 6523                      | 31.63 | <.0001               |
| Diabetes mellitus               | 309                 | 14.99 | 3123                      | 15.15 | 0.8467               |
| Dyslipidemia                    | 714                 | 34.63 | 4499                      | 21.82 | <.0001               |
| Atrial fibrillation             | 49                  | 2.38  | 301                       | 1.46  | 0.0013               |
| Ischemic heart disease          | 537                 | 26.04 | 3257                      | 15.8  | <.0001               |
| Heart failure                   | 217                 | 10.52 | 833                       | 4.04  | <.0001               |
| Peripheral vascular disease     | 136                 | 6.6   | 668                       | 3.24  | <.0001               |
| Chronic kidney disease          | 1011                | 49.03 | 452                       | 2.19  | <.0001               |
| Malignancy of kidney or bladder | 65                  | 3.15  | 93                        | 0.45  | <.0001               |
| Acute myocardial infarction     |                     |       |                           |       | <.0001               |
| No                              | 2002                | 97.09 | 20419                     | 99.03 |                      |
| Yes                             | 60                  | 2.91  | 201                       | 0.97  |                      |

\*Control group (non-ADPKD group) was matched by age, sex, monthly income and urbanization level.

<sup>a</sup>Chi-square test for categorical variables

AMI = acute myocardial infarction, ADPKD = autosomal-dominant polycystic kidney disease,

IQR = Interquartile range, NTD = New Taiwan dollars.

**Table 2: Comparison of prevalence of AMI and relevant cardiovascular comorbidities between American and Taiwanese patients with ADPKD**

|                             | American<br>(N = 419)* | Taiwanese<br>(N = 2062) | P-value |
|-----------------------------|------------------------|-------------------------|---------|
| Age                         | 53.2 ± 13.7            | 47.6 ± 13.6             |         |
| Gender                      |                        |                         | <.0001  |
| Female                      | 64.6% (265/410)        | 51.5%                   |         |
| Male                        | 35.4% (145/410)        | 48.5%                   |         |
| Acute myocardial infarction | 6% (24/399)            | 2.9%                    | 0.0567  |
| Comorbidities               |                        |                         |         |
| Hypertension                | 86.6% (356/411)        | 81.1%                   | 0.0081  |
| Diabetes mellitus           | 8.7% (36/412)          | 15.0%                   | 0.0008  |
| Dyslipidemia                | 45.7% (188/411)        | 34.6%                   | <.0001  |
| Arrhythmia                  | 25.9% (103/398)        | 19.3%                   | 0.0028  |
| Heart failure               | 9.5% (38/400)          | 10.5%                   | 0.5527  |
| Valvular heart disease      | 14.4% (57/397)         | 8.5%                    | 0.0003  |
| Peripheral vascular disease | 16.5% (66/400)         | 6.6%                    | <.0001  |

AMI = acute myocardial infarction, ADPKD = autosomal dominant polycystic kidney disease

\*Data was adopted from the publication by Helal et al.[9]

patients aged  $\geq 40$  years old with any one of traditional risk factors of atherosclerosis. Moreover, as to those subgroups void of atrial fibrillation, heart failure, peripheral vascular disease, chronic kidney disease and urogenital malignancy, ADPKD was still identified as an independent predictor for future development of AMI (all  $p$ -values  $< 0.0001$ ).

#### Cox regression analysis for identification of the independent risks of AMI (Table 4)

By using the univariate Cox regression analysis, we found that the risk of AMI significantly increased with age. Additionally, male gender, ADPKD, risk factors of atherosclerosis (i.e., hypertension, diabetes mellitus, and dyslipidemia) and each of comorbidities were also identified as the independent risk factors for AMI. After adjusting for age, gender and comorbidities with multivariate model, ADPKD *per se* remained a powerful predictor for future development of AMI (adjusted HR 2.09, 95% CI 1.41 to 3.1,  $p=0.0003$ ). Besides, we also found that male gender, older age, hypertension, diabetes mellitus, and heart failure were strongly and independently predictive of AMI (all  $p$ -values  $< 0.0007$ ).

#### Occurrence of AMI in relation to length of time since diagnosis of ADPKD (Figure 1)

The occurrence of AMI increased steadily with time in both ADPKD and non-ADPKD groups. However, the

Kaplan-Meier analysis demonstrated that the cumulative incidence of AMI was significantly higher in the ADPKD group than in the non-ADPKD group (by Log-Rank test,  $p < 0.001$ ).

## DISCUSSION

Previous studies emphasized on the high prevalence of CV morbidities and mortalities in ADPKD [4, 6, 9]. Additionally, the prevalence of ADPKD has been established to be 1 to 2.5 in 1,000 Caucasian general populations [3]. However, these data were only analyzed from the database of Western countries [4, 6, 9]. Accordingly, the real-world association between AMI and ADPKD in the Asian population remains unclear. The present study utilizing Taiwan NHIRD was the first one to find that the prevalence of ADPKD in Asian population (i.e., approximately 2.1 in 1,000 Taiwanese individuals) is very similar to that in Western countries. Additionally, the prevalence of AMI in the Taiwan ADPKD population was approximate 3% (Tables 1 and 2). Furthermore, the ADPKD *per se* possessed two-fold risk for development of AMI in the future. Elderly male ADPKD patients with atherosclerotic risk factors might have higher risk for event of AMI. Moreover, male gender, older age, hypertension, diabetes and heart failure were also identified as the independent risk factors for future development of AMI in ADPKD. Most importantly, to the best of our knowledge, this is the first and biggest nationwide population-based

**Table 3: Comparison of incidence and hazard ratio of AMI between patients with and without ADPKD, stratified by gender, age and comorbidities**

| Variables                   | ADPKD          |        |       |                |       |        | IRR (95% CI)           | Adjusted HR (95% CI)  |
|-----------------------------|----------------|--------|-------|----------------|-------|--------|------------------------|-----------------------|
|                             | No (N = 20620) |        |       | Yes (N = 2062) |       |        |                        |                       |
|                             | Event          | PY     | Rate  | Event          | PY    | Rate   |                        |                       |
| Acute myocardial infarction | 201            | 138508 | 145.1 | 60             | 13059 | 459.5  | 3.17 (2.37 - 4.22)***  | 2.43 (1.8 - 3.29)***  |
| Sex                         |                |        |       |                |       |        |                        |                       |
| Female                      | 67             | 72435  | 92.5  | 21             | 6923  | 303.3  | 3.28 (2.01 - 5.35)***  | 2.7 (1.62 - 4.47)***  |
| Male                        | 134            | 66073  | 202.8 | 39             | 6136  | 635.6  | 3.13 (2.19 - 4.48)***  | 2.3 (1.58 - 3.35)***  |
| Age                         |                |        |       |                |       |        |                        |                       |
| 18-39                       | 9              | 38312  | 23.5  | 2              | 3788  | 52.8   | 2.25 (0.49 - 10.4)     | 1.22 (0.19 - 8.03)    |
| 40-65                       | 114            | 85756  | 132.9 | 45             | 8125  | 553.8  | 4.17 (2.95 - 5.88)***  | 2.74 (1.91 - 3.94)*** |
| >65                         | 78             | 14440  | 540.2 | 13             | 1146  | 1134.4 | 2.1 (1.17 - 3.78)*     | 1.95 (1.08 - 3.51)*   |
| Comorbidities               |                |        |       |                |       |        |                        |                       |
| Hypertension                |                |        |       |                |       |        |                        |                       |
| No                          | 41             | 91966  | 44.6  | 5              | 2129  | 234.9  | 5.27 (2.08 - 13.33)*** | 6.49 (2.52 - 16.7)*** |
| Yes                         | 160            | 46542  | 343.8 | 55             | 10930 | 503.2  | 1.46 (1.08 - 1.99)*    | 2.21 (1.61 - 3.03)*** |
| Diabetes mellitus           |                |        |       |                |       |        |                        |                       |
| No                          | 113            | 116325 | 97.1  | 45             | 11138 | 404    | 4.16 (2.94 - 5.88)***  | 2.64 (1.83 - 3.83)*** |
| Yes                         | 88             | 22183  | 396.7 | 15             | 1921  | 780.8  | 1.97 (1.14 - 3.4)*     | 2.05 (1.18 - 3.56)*   |
| Dyslipidemia                |                |        |       |                |       |        |                        |                       |
| No                          | 114            | 106456 | 107.1 | 33             | 8513  | 387.6  | 3.62 (2.46 - 5.33)***  | 2.49 (1.66 - 3.74)*** |
| Yes                         | 87             | 32052  | 271.4 | 27             | 4546  | 593.9  | 2.19 (1.42 - 3.37)***  | 2.29 (1.46 - 3.59)*** |
| Atrial fibrillation         |                |        |       |                |       |        |                        |                       |
| No                          | 181            | 136277 | 132.8 | 55             | 12713 | 432.6  | 3.26 (2.41 - 4.4)***   | 2.54 (1.85 - 3.49)*** |
| Yes                         | 20             | 2231   | 896.5 | 5              | 346   | 1445.1 | 1.61 (0.61 - 4.3)      | 1.57 (0.56 - 4.39)    |
| Ischemic heart disease      |                |        |       |                |       |        |                        |                       |
| No                          | 0              | 115228 | 0     | 0              | 9556  | 0      | ---†                   | ---                   |
| Yes                         | 201            | 23280  | 863.4 | 60             | 3503  | 1712.8 | 1.98 (1.49 - 2.65)***  | 2.17 (1.61 - 2.93)*** |
| Heart failure               |                |        |       |                |       |        |                        |                       |
| No                          | 142            | 132487 | 107.2 | 41             | 11639 | 352.3  | 3.29 (2.32 - 4.65)***  | 2.57 (1.78 - 3.71)*** |
| Yes                         | 59             | 6021   | 979.9 | 19             | 1420  | 1338   | 1.37 (0.81 - 2.29)     | 1.49 (0.86 - 2.56)    |
| Peripheral vascular disease |                |        |       |                |       |        |                        |                       |
| No                          | 185            | 133663 | 138.4 | 54             | 12072 | 447.3  | 3.23 (2.39 - 4.38)***  | 2.42 (1.76 - 3.33)*** |
| Yes                         | 16             | 4845   | 330.2 | 6              | 987   | 607.9  | 1.84 (0.72 - 4.7)      | 2.65 (0.96 - 7.25)    |
| Chronic kidney disease      |                |        |       |                |       |        |                        |                       |
| No                          | 178            | 135392 | 131.5 | 21             | 6159  | 341    | 2.59 (1.65 - 4.08)***  | 2.82 (1.76 - 4.53)*** |
| Yes                         | 23             | 3116   | 738.1 | 39             | 6900  | 565.2  | 0.77 (0.46 - 1.28)     | 1.14 (0.65 - 2)       |

(Continued)

| Variables                       | ADPKD          |        |       |                |       |       | IRR (95% CI)         | Adjusted HR (95% CI)  |
|---------------------------------|----------------|--------|-------|----------------|-------|-------|----------------------|-----------------------|
|                                 | No (N = 20620) |        |       | Yes (N = 2062) |       |       |                      |                       |
|                                 | Event          | PY     | Rate  | Event          | PY    | Rate  |                      |                       |
| Malignancy of kidney or bladder |                |        |       |                |       |       |                      |                       |
| No                              | 196            | 137883 | 142.1 | 59             | 12620 | 467.5 | 3.29 (2.46 - 4.4)*** | 2.55 (1.88 - 3.47)*** |
| Yes                             | 5              | 625    | 800   | 1              | 439   | 227.8 | 0.28 (0.03 - 2.44)   | ---                   |

\* $p < 0.05$ , \*\* $p < 0.01$ , \*\*\* $p < 0.001$

†Insufficient case number for statistical analysis

Rate denotes incidence rate (per 100,000).

Adjusted HR (hazard ratio) indicates multivariate analysis with adjusting for age, gender, and comorbidities.

AMI = acute myocardial infarction, ADPKD = autosomal dominant polycystic kidney disease,

PY = person-year, IRR = incidence rate ratio, CI = confidence interval.

**Table 4: Cox proportional hazard regression model of predictors for new occurrence of AMI**

|                                 | Univariate |              |         | Multivariate |             |         |
|---------------------------------|------------|--------------|---------|--------------|-------------|---------|
|                                 | HR         | 95% CI       | P-value | HR           | 95% CI      | P-value |
| Gender                          |            |              |         |              |             |         |
| Female                          | 1.00       |              |         | 1.00         |             |         |
| Male                            | 2.17       | 1.68 - 2.81  | <.0001  | 2.4          | 1.83 - 3.15 | <.0001  |
| Age                             |            |              |         |              |             |         |
| 18-39                           | 1.00       |              |         | 1.00         |             |         |
| 40-65                           | 6.43       | 3.49 - 11.84 | <.0001  | 4.11         | 2.19 - 7.72 | <.0001  |
| >65                             | 22.24      | 11.9 - 41.58 | <.0001  | 7.14         | 3.67 - 13.9 | <.0001  |
| Urbanization                    |            |              |         |              |             |         |
| 1 (highest)                     | 1.00       |              |         | 1.00         |             |         |
| 2                               | 0.88       | 0.67 - 1.17  | 0.3754  | 0.81         | 0.61 - 1.07 | 0.1319  |
| 3                               | 1.13       | 0.78 - 1.62  | 0.5223  | 0.9          | 0.62 - 1.32 | 0.5984  |
| 4 (lowest)                      | 1.85       | 1.18 - 2.9   | 0.007   | 1.29         | 0.81 - 2.07 | 0.2837  |
| Monthly income (NTD)            |            |              |         |              |             |         |
| 0                               | 1.00       |              |         | 1.00         |             |         |
| 1-15,840                        | 1.2        | 0.81 - 1.79  | 0.3617  | 1.24         | 0.83 - 1.86 | 0.2921  |
| 15,841-25,000                   | 0.88       | 0.62 - 1.24  | 0.4566  | 0.91         | 0.63 - 1.32 | 0.6277  |
| >25,000                         | 0.59       | 0.4 - 0.88   | 0.0095  | 0.69         | 0.45 - 1.08 | 0.1018  |
| ADPKD                           |            |              |         |              |             |         |
| No                              | 1.00       |              |         | 1.00         |             |         |
| Yes                             | 3.21       | 2.4 - 4.28   | <.0001  | 2.09         | 1.41 - 3.1  | 0.0003  |
| Comorbidities                   |            |              |         |              |             |         |
| Hypertension                    | 7.53       | 5.47 - 10.35 | <.0001  | 3.08         | 2.14 - 4.41 | <.0001  |
| Diabetes mellitus               | 3.4        | 2.65 - 4.36  | <.0001  | 1.62         | 1.23 - 2.12 | 0.0006  |
| Dyslipidemia                    | 2.4        | 1.88 - 3.07  | <.0001  | 1.25         | 0.96 - 1.63 | 0.1039  |
| Atrial fibrillation             | 6.03       | 3.99 - 9.11  | <.0001  | 1.4          | 0.89 - 2.19 | 0.1436  |
| Heart failure                   | 8.1        | 6.21 - 10.56 | <.0001  | 3.09         | 2.27 - 4.2  | <.0001  |
| Peripheral vascular disease     | 2.26       | 1.46 - 3.5   | 0.0002  | 0.84         | 0.53 - 1.31 | 0.4366  |
| Chronic kidney disease          | 4.39       | 3.3 - 5.84   | <.0001  | 1.23         | 0.83 - 1.82 | 0.3007  |
| Malignancy of kidney or bladder | 3.35       | 1.49 - 7.53  | 0.0034  | 1.27         | 0.56 - 2.89 | 0.573   |

AMI = acute myocardial infarction, HR = hazard ratio, CI = confidence interval, NTD = New Taiwan dollars, ADPKD = autosomal dominant polycystic kidney disease



cohort study to establish a strong association between AMI and ADPKD in Asian population.

Fick et al. previously investigated the causes of death in ADPKD by using the data from autopsies [6] and the results demonstrated that up to 89% of the autopsied patients had history of cardiac hypertrophy and 81% of them had history of coronary artery disease. Besides, moderate to severe arteriosclerosis was also commonly found in aorta, suggesting that left main ostial stenosis or aortic disease might occur in patients with ADPKD. Furthermore, Helal et al. has recently reported that the prevalence of CV events in ADPKD was common, ranging from 25.9% for arrhythmia to 5% for brain aneurysm [9]. These data [6, 9] and previous literature reviews [4, 7, 12] implied that cardiovascular complications have emerged as a major cause of death in patients with ADPKD, especially in those patients with left ventricular hypertrophy (i.e., the most powerful predictor for CV morbidity and mortality), intracranial and extracranial aneurysms, as well as coronary artery diseases. In addition, data from our study also showed that the frequency of hypertension, diabetes, and dyslipidemia was notably higher in ADPKD than in non-ADPKD group. Accordingly, the aforementioned and our studies [4, 6, 7, 9, 12] highlighted that to early recognize ADPKD and aggressively control the blood pressure could be the better way to prevent most of these CV abnormalities and slow-down renal function deterioration to end-stage renal disease. Unfortunately, even though abundant evidence had shown that Renin-Angiotensin-Aldosterone System (RAAS) blockade and statin are effective to treat chamber hypertrophy, vascular remodeling, and endothelial dysfunction in

ADPKD [13–15], death from AMI is always unpredictable and catastrophic. Therefore, to further understand the incidence and risk of AMI in ADPKD is a very important clinical issue.

Apart from traditional risk for coronary atherosclerosis, e.g., advancing age, male gender, hypertension, diabetes, dyslipidemia, and so on, ADPKD *per se* was also identified as a risk factor for AMI in the present study. The potential pathophysiology was supposed to be related to intracoronary aneurysm, spontaneous coronary dissection, and early-onset endothelial dysfunction [4, 16–18]. The prevalence of AMI in ADPKD patients has been well recognized to be 6% in the United States by previous study [9]. On the other hand, the prevalence of AMI in middle-aged general population was estimated of 2.03% [19], suggesting that AMI is a common and severe CV complication of ADPKD in the Western countries (i.e., 6% *v.s.* 2.03%). Similarly, the essential findings from our study demonstrated that as compared with general population (i.e., non-ADPKD) in Taiwan, patients with ADPKD had significantly higher prevalence of AMI (i.e., 2.91% *v.s.* 0.97%,  $p < 0.0001$ ). Besides, our study found that ADPKD *per se* carried two-fold risk for occurrence of AMI. Therefore, ADPKD indeed should be recognized as an independent risk factor for future development of AMI all over the world. This finding strengthens again the importance of early and vigorous controlling underlying diseases, especially for hypertension, in any ADPKD patient. Most importantly, heart attack had to always be taken into consideration for those patients with ADPKD complaining any chest discomfort.

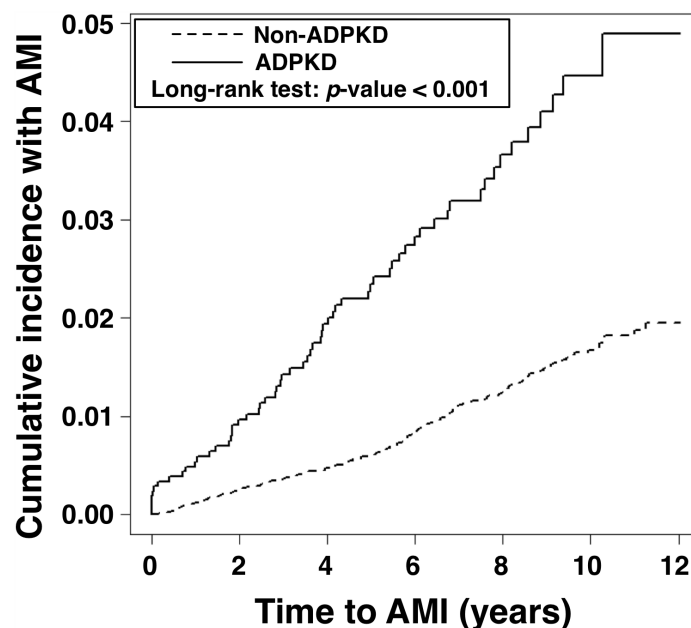

**Figure 1: Cumulative incidence of acute myocardial infarction in the ADPKD group versus the non-ADPKD group.** ADPKD = autosomal-dominant polycystic kidney disease

The prevalence of AMI in ADPKD in Taiwan was lower than in America (i.e., 2.9% v.s. 6%,  $p=0.056$ ) [9]. However, we remain uncertain for why the different prevalence of AMI in ADPKD is present between Asian and Western population. Perhaps, it is due to the ethnical disparity, environment exposure, or significantly lower prevalence of dyslipidemia in Taiwanese as compared to that in Western ADPKD population (Table 2). Interestingly, recent data from literature reviews had showed that Chinese have less prevalence of ischemic heart disease and AMI as compared to Europeans and Americans [20–23]. Therefore, the results of these epidemiological analyses supported our present findings.

## Limitations

Our study has limitations. First, detailed personal history and lifestyle information such as smoking, body mass index, and functional capacity are not provided by Taiwan NHIRD. Second, all the data in the current study have been registered with ICD-9-CM codes, therefore further classification of disease status and determination of disease lesion is impracticable. Third, the laboratory data are not available in NHIRD. Fourth, this study did not investigate the incidence of cerebral vascular accident in ADPKD patients. Finally, the impact of medications, e.g., RAAS blockades and statins, on ADPKD patients was not analyzed in the present study.

## MATERIALS AND METHODS

### Data source

The National Health Insurance (NHI) program in Taiwan provides health care to 99% of the 23.74 million population and links 97% of the hospitals and clinics in Taiwan (<http://nhird.nhri.org.tw/en/>) [11]. The researchers are able to register and claim data of 1,000,000 individuals who have been systematically selected from all insured enrollees of the National Health Research Institute (NHRI) data bank. The NHI dataset included robust information regarding medical facilities, details of inpatient and outpatient orders, dental services, prescription of drugs, patient care provided by physicians, and the scrambled registration files (e.g., payment, regions, catastrophic illness, and so on.) other than laboratory data. Diagnoses are entered in based on the International Classification of Diseases, 9<sup>th</sup> Revision, Clinical Modification (ICD-9-CM).

### Study population

This was a nationwide retrospective population-based cohort study. We selected patients with ADPKD (ICD-9-CM codes: 753.1) from 1,000,000 individuals in Taiwan NHIRD from January 1997 to December 2008.

After excluding patients with follow-up duration of less than one year, missing data on baseline characteristics, age of less than 18 years, and initially concomitant diagnoses of AMI (ICD-9-CM codes 410-411) and end-stage renal disease (V451 and 549.1), a total of 2,062 ADPKD patients were identified. The comparison cohort was selected randomly by age-, gender-, income-, and urbanization-matched individuals without history of ADPKD. The ratio of non-ADPKD to ADPKD was 10:1, and therefore 20,620 non-ADPKD patients were allocated into control group (Figure 2). Urbanization of the cities/counties was categorized into four levels (from level 1 to 4 indicating the most to the least urbanized, respectively). The insurance taxable income level per month (expressed by New Taiwan dollars, NTD) was also stratified into four classifications according to monthly salary of individual insured enrollee.

## Outcomes

The diagnoses of ADPKD and AMI were confirmed by consecutive and at least three records of outpatient visits within one year or one diagnosis on admission during study period. We also verified the accuracy of diagnosis of ADPKD by checking the registration of catastrophic illness. The date of the initial diagnosis was defined as the index date. We estimated pre-existing comorbidities for each participant with hypertension (ICD-9-CM codes 401-405), diabetes (250), dyslipidemia (272), atrial fibrillation (427.31), ischemic heart disease (410-414), heart failure (428), peripheral vascular disease (440, 443.9, 444.0, 444.2, 444.8, 444.9, 447.8, 447.9, 445.0, 445.02), chronic kidney disease (585), and malignancy of kidney and bladder (188-189). The main purpose of this study was to evaluate the incidence of AMI (410-411) more than one year after the diagnosis of ADPKD. In addition, we compared Taiwanese data with American registered data to elucidate the ethnic difference of ADPKD and its comorbidities. Furthermore, the association between ADPKD and AMI was also analyzed for clarification of real-world risk of AMI in Taiwanese patients with ADPKD.

## Statistical analysis

We compared the distribution of demographic factors and the rate of comorbidities between the study cohort (i.e., ADPKD) and matched control cohort (i.e., non-ADPKD) with the independent *t* test or Chi-square test. The incidence rate and 95% confidence intervals (95% CI) of AMI were calculated for the entire follow-up period. Besides, Chi-square test was utilized to compare prevalence of AMI and relevant cardiovascular comorbidities between American and Taiwanese patients with ADPKD. We also utilized the Kaplan-Meier method



to estimate cumulative incidences and performed the Log-Rank test to examine differences between disease group and non-disease group in the cohort study. Furthermore, Cox proportional hazard regression models were used to compute the hazard ratios (HRs) and accompanying 95% CIs after adjusting for age, gender, urbanization, income and comorbidities. In order to examine potential effect modifiers, we conducted analyses categorized by groups with and without ADPKD. We also examined the outcome (i.e., occurrence of AMI) stratified by groups according to gender, age, and each of comorbidities. The sensitivity analyses were applied to evaluate the difference and consistency between ADPKD and the risk of AMI. Two-tailed *p*-value <0.05 was considered statistically significant. All the analyses were conducted using SAS statistical software (Version 9.4; SAS Institute, Cary, NC, USA).

## CONCLUSION

The results of the present study displayed that the Taiwanese patients with ADPKD had substantially higher incidence of AMI than those without ADPKD. In addition, ADPKD *per se* carried the two-fold risk for development of AMI in the future.

## Abbreviations

ADPKD, autosomal-dominant polycystic kidney disease;  
 AMI, acute myocardial infarction;  
 CV, cardiovascular;  
 NHIRD, National Health Insurance Research Database;  
 NHRI, National Health Research Institute;  
 HRs, hazard ratios.

## ACKNOWLEDGMENTS

We would like to thank Institute of Occupational Medicine and Industrial Hygiene, College of Public Health, National Taiwan University, Taiwan for data acquisition and assistance in analysis. We also thank Center of Excellence of Chang Gung Research Datalink (CORPG6D0161) for the comments and assistance in data analysis. In addition, this study was supported by a grant from Chang Gung Memorial Hospital, Chia-yi Branch, and based on released data from the National Health Insurance Research Database offered by the Bureau of National Health Insurance, Department of Health, Taiwan. We analyzed and interpreted the retrieved data for academic

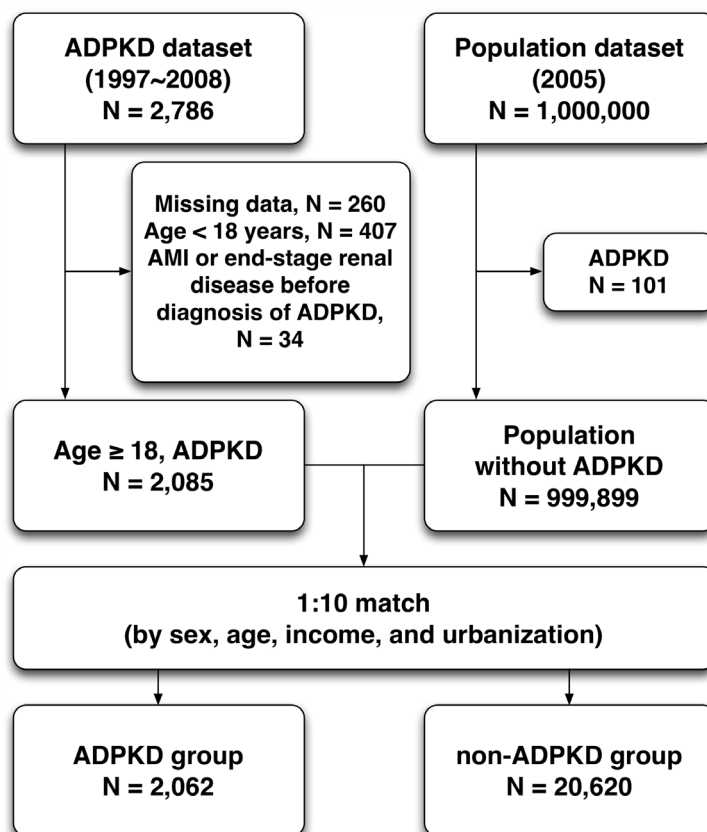

**Figure 2: Flowchart of the patient enrollment for the ADPKD group and the matched non-ADPKD group.** ADPKD = autosomal-dominant polycystic kidney disease, AMI = acute myocardial infarction

purpose, and therefore the viewpoint is not represented by the Bureau of National Health Insurance, Department of Health, or National Health Research Institutes.

## CONFLICTS OF INTEREST

All authors report no conflicts of interest.

## FINANCIAL SUPPORT

None.

## Author contributions

PHS and HJC participated in the design of the study, data acquisition, and analysis as well as drafting the manuscript. YHY and CJC were responsible for the data acquisition and troubleshooting. JYC participated in data analysis, and interpretation. HKY conceived of the study, participated in its design and coordination, and helped to draft the manuscript. All authors read and approved the final manuscript.

## REFERENCES

1. Torres VE, Harris PC, Pirson Y. Autosomal dominant polycystic kidney disease. *Lancet*. 2007; 369:1287-1301.
2. Johnson AM, Gabow PA. Identification of patients with autosomal dominant polycystic kidney disease at highest risk for end-stage renal disease. *J Am Soc Nephrol*. 1997; 8:1560-1567.
3. Torres VE, Harris PC. Autosomal dominant polycystic kidney disease: the last 3 years. *Kidney Int*. 2009; 76:149-168.
4. Perrone RD, Ruthazer R, Terrin NC. Survival after end-stage renal disease in autosomal dominant polycystic kidney disease: contribution of extrarenal complications to mortality. *Am J Kidney Dis*. 2001; 38:777-784.
5. Florijn KW, Noteboom WM, van Saase JL, Chang PC, Breuning MH, Vandenbroucke JP. A century of mortality in five large families with polycystic kidney disease. *Am J Kidney Dis*. 1995; 25:370-374.
6. Fick GM, Johnson AM, Hammond WS, Gabow PA. Causes of death in autosomal dominant polycystic kidney disease. *J Am Soc Nephrol*. 1995; 5:2048-2056.
7. Ecker T, Schrier RW. Cardiovascular abnormalities in autosomal-dominant polycystic kidney disease. *Nat Rev Nephrol*. 2009; 5:221-228.
8. Perrone RD, Malek AM, Watnick T. Vascular complications in autosomal dominant polycystic kidney disease. *Nat Rev Nephrol*. 2015; 11:589-598.
9. Helal I, Reed B, Mettler P, Mc Fann K, Tkachenko O, Yan XD, Schrier RW. Prevalence of cardiovascular events in patients with autosomal dominant polycystic kidney disease. *Am J Nephrol*. 2012; 36:362-370.
10. Yang JY, Chen L, Chao CT, Peng YS, Chiang CK, Kao TW, Chien KL, Wu HY, Huang JW, Hung KY. Comparative Study of Outcomes among Patients with Polycystic Kidney Disease on Hemodialysis and Peritoneal Dialysis. *Sci Rep*. 2015; 5:12816.
11. Cheng T. Taiwan's National Health Insurance system: high value for the dollar. In Okma, K.G.H., Crivelli, L. ed. *Six Countries, Six Reform Models: The Health Reform Experience of Israel, the Netherlands, New Zealand, Singapore, Switzerland and Taiwan*. New Jersey: World Scientific. 2009: 71-204.
12. Koren MJ, Devereux RB, Casale PN, Savage DD, Laragh JH. Relation of left ventricular mass and geometry to morbidity and mortality in uncomplicated essential hypertension. *Ann Intern Med*. 1991; 114:345-352.
13. Chapman AB, Johnson AM, Gabow PA. Pregnancy outcome and its relationship to progression of renal failure in autosomal dominant polycystic kidney disease. *J Am Soc Nephrol*. 1994; 5:1178-1185.
14. Schrier RW, Abebe KZ, Perrone RD, Torres VE, Braun WE, Steinman TI, Winklhofer FT, Brosnahan G, Czarnecki PG, Hogan MC, Miskulin DC, Rahbari-Oskoui FF, Grantham JJ, et al. Blood pressure in early autosomal dominant polycystic kidney disease. *N Engl J Med*. 2014; 371:2255-2266.
15. Torres VE, Abebe KZ, Chapman AB, Schrier RW, Braun WE, Steinman TI, Winklhofer FT, Brosnahan G, Czarnecki PG, Hogan MC, Miskulin DC, Rahbari-Oskoui FF, Grantham JJ, et al. Angiotensin blockade in late autosomal dominant polycystic kidney disease. *N Engl J Med*. 2014; 371:2267-2276.
16. Turkmen K, Oflaz H, Uslu B, Cimen AO, Elitok A, Kasikcioglu E, Alisir S, Tufan F, Namli S, Uysal M, Ecker T. Coronary flow velocity reserve and carotid intima media thickness in patients with autosomal dominant polycystic kidney disease: from impaired tubules to impaired carotid and coronary arteries. *Clin J Am Soc Nephrol*. 2008; 3:986-991.
17. Itty CT, Farshid A, Talaulikar G. Spontaneous coronary artery dissection in a woman with polycystic kidney disease. *Am J Kidney Dis*. 2009; 53:518-521.
18. Basile C, Lucarelli K, Langialonga T. Spontaneous coronary artery dissection: One more extrarenal manifestation of autosomal dominant polycystic kidney disease? *J Nephrol*. 2009; 22:414-416.
19. Manuel DG, Lim JJ, Tanuseputro P, Stukel TA. How many people have had a myocardial infarction? Prevalence estimated using historical hospital data. *BMC public health*. 2007; 7:174.
20. Sheth T, Nair C, Nargundkar M, Anand S, Yusuf S. Cardiovascular and cancer mortality among Canadians

- of European, south Asian and Chinese origin from 1979 to 1993 an analysis of 1.2 million deaths. *CMAJ*. 1999; 161:132-138.
21. Anand SS, Yusuf S, Vuksan V, Devanesen S, Teo KK, Montague PA, Kelemen L, Yi C, Lonn E, Gerstein H, Hegele RA, McQueen M. Differences in risk factors, atherosclerosis, and cardiovascular disease between ethnic groups in Canada: the Study of Health Assessment and Risk in Ethnic groups (SHARE). *Lancet*. 2000; 356:279-284.
  22. Fang J, Madhavan S, Alderman MH. Cardiovascular mortality of Chinese in New York City. *J Urban Health*. 1999; 76:51-61.
  23. McKeigue PM, Marmot M. Myocardial infarction in Asian men. *BMJ*. 1989; 299:179-180.
